# Supplementary material for: Isolation of maltol derivatives fromStellera chamaejasmeand the anti-atopic properties of maltol on skin lesions in DNCB-stimulated mice
Source: Royal Society of Chemistry journal article supplement (doi:10.1039/c8ra09743g), 2019-01-01

## SUPPLEMENTARY DATA

### Isolation of maltol derivatives from *Stellera chamaejasme* and the anti-atopic properties of maltol on skin lesions in DNCB-stimulated mice

Beom-Geun Jo,<sup>‡a</sup> No-June Park,<sup>‡b</sup> Su-Nam Kim,<sup>b</sup> Jonghwan Jegal,<sup>a</sup> Sangho Choi,<sup>c</sup> Sang Woo Lee,<sup>c</sup> Li Wan Yi,<sup>d</sup> Seoung Rak Lee,<sup>e</sup> Ki Hyun Kim<sup>\*e</sup> and Min Hye Yang<sup>\*a</sup>

<sup>a</sup>*College of Pharmacy, Pusan National University, Busan 46241, South Korea. E-mail: mhyang@pusan.ac.kr; Tel: +82-51-510-2811; +82-51-513-6754*

<sup>b</sup>*Natural Products Research Institute, Korea Institute of Science and Technology, Gangneung 25451, South Korea*

<sup>c</sup>*International Biological Material Research Center, Korea Research Institute of Bioscience and Biotechnology, Daejeon 34141, South Korea*

<sup>d</sup>*Institute of Medicinal Plants, Yunnan Academy of Agricultural Sciences, Yunnan 650205, China*

<sup>e</sup>*Natural Product Research Laboratory, School of Pharmacy, Sungkyunkwan University, Suwon, 16419, South Korea. E-mail: khkim83@skku.edu; Tel: +82-31-290-7700; Fax: +82-31-290-7730*

#### Supporting Information Contents:

- S1.** The <sup>1</sup>H NMR spectrum of compound **3**
- S2.** The <sup>13</sup>C NMR spectrum of compound **3**
- S3.** The <sup>1</sup>H-<sup>1</sup>H COSY spectrum of compound **3**
- S4.** The <sup>1</sup>H-<sup>1</sup>H NOESY spectrum of compound **3**
- S5.** The HMQC spectrum of compound **3**
- S6.** The HMBC spectrum of compound **3**

**S1.** The  $^1\text{H}$  NMR spectrum of compound **3**

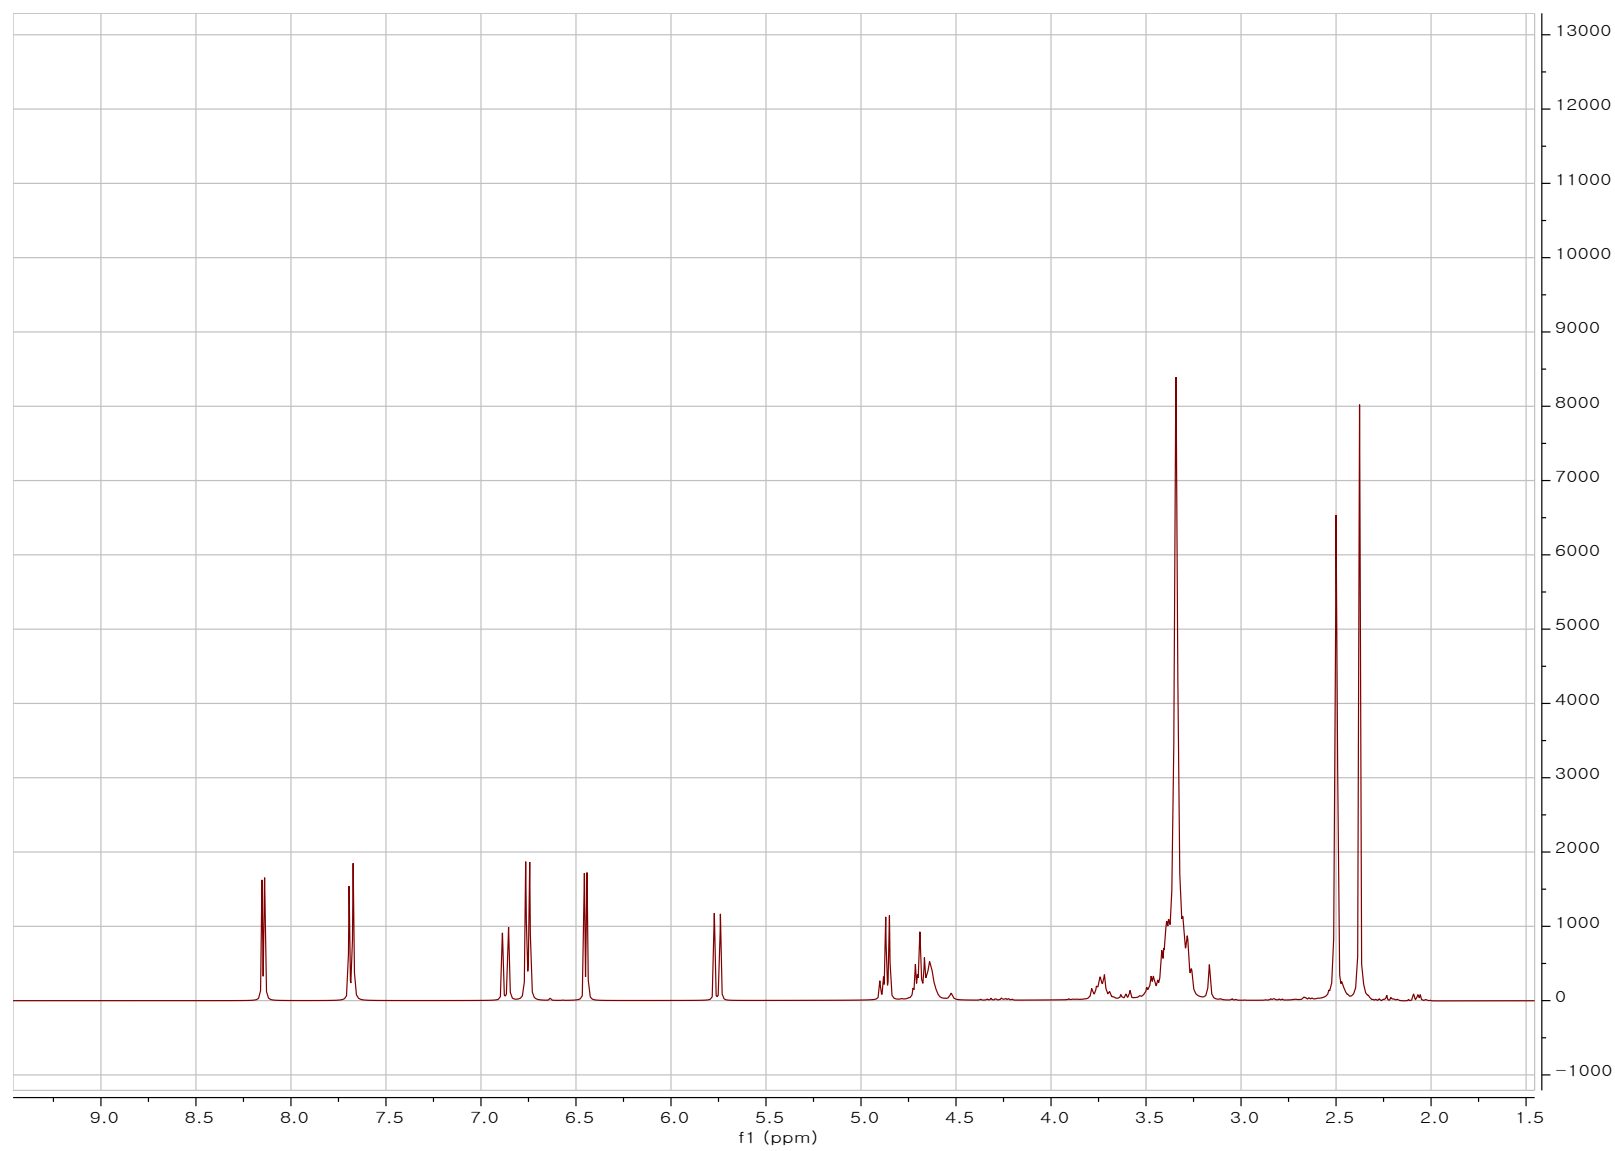

## S2. The $^{13}\text{C}$ NMR spectrum of compound **3**

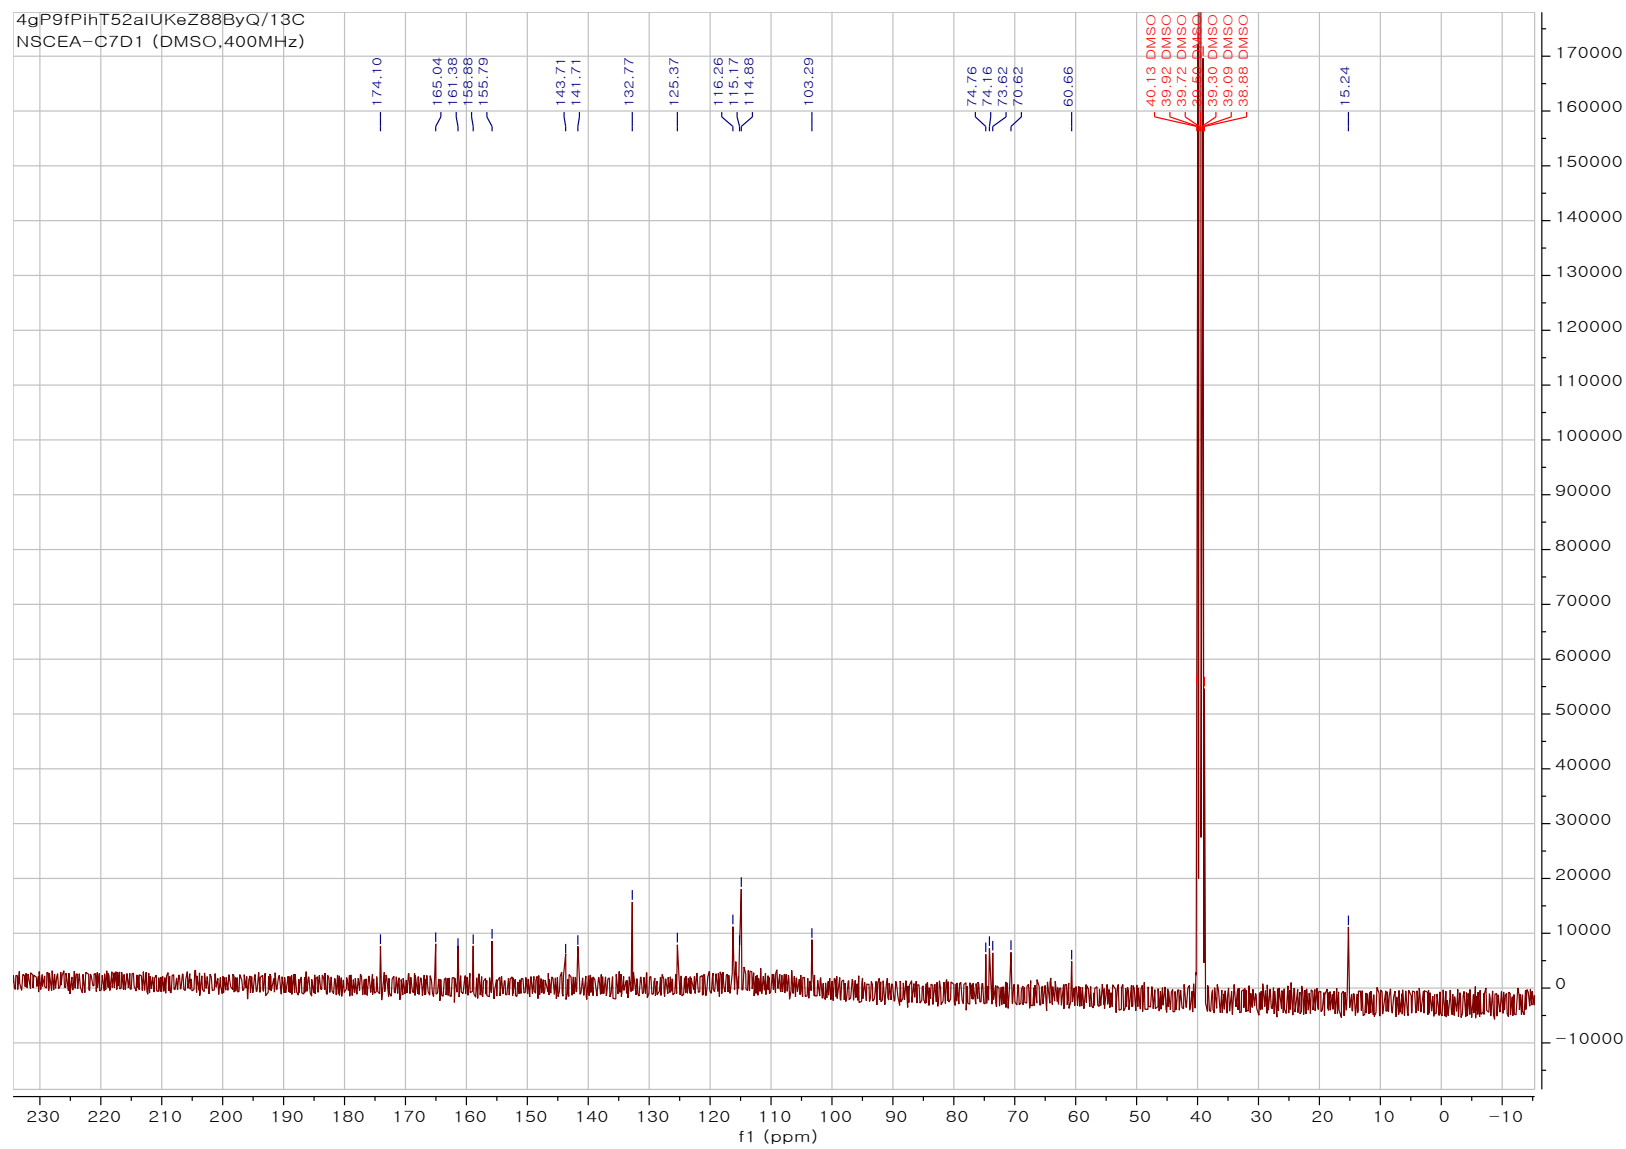

S3. The  $^1\text{H}$ - $^1\text{H}$  COSY spectrum of compound 3

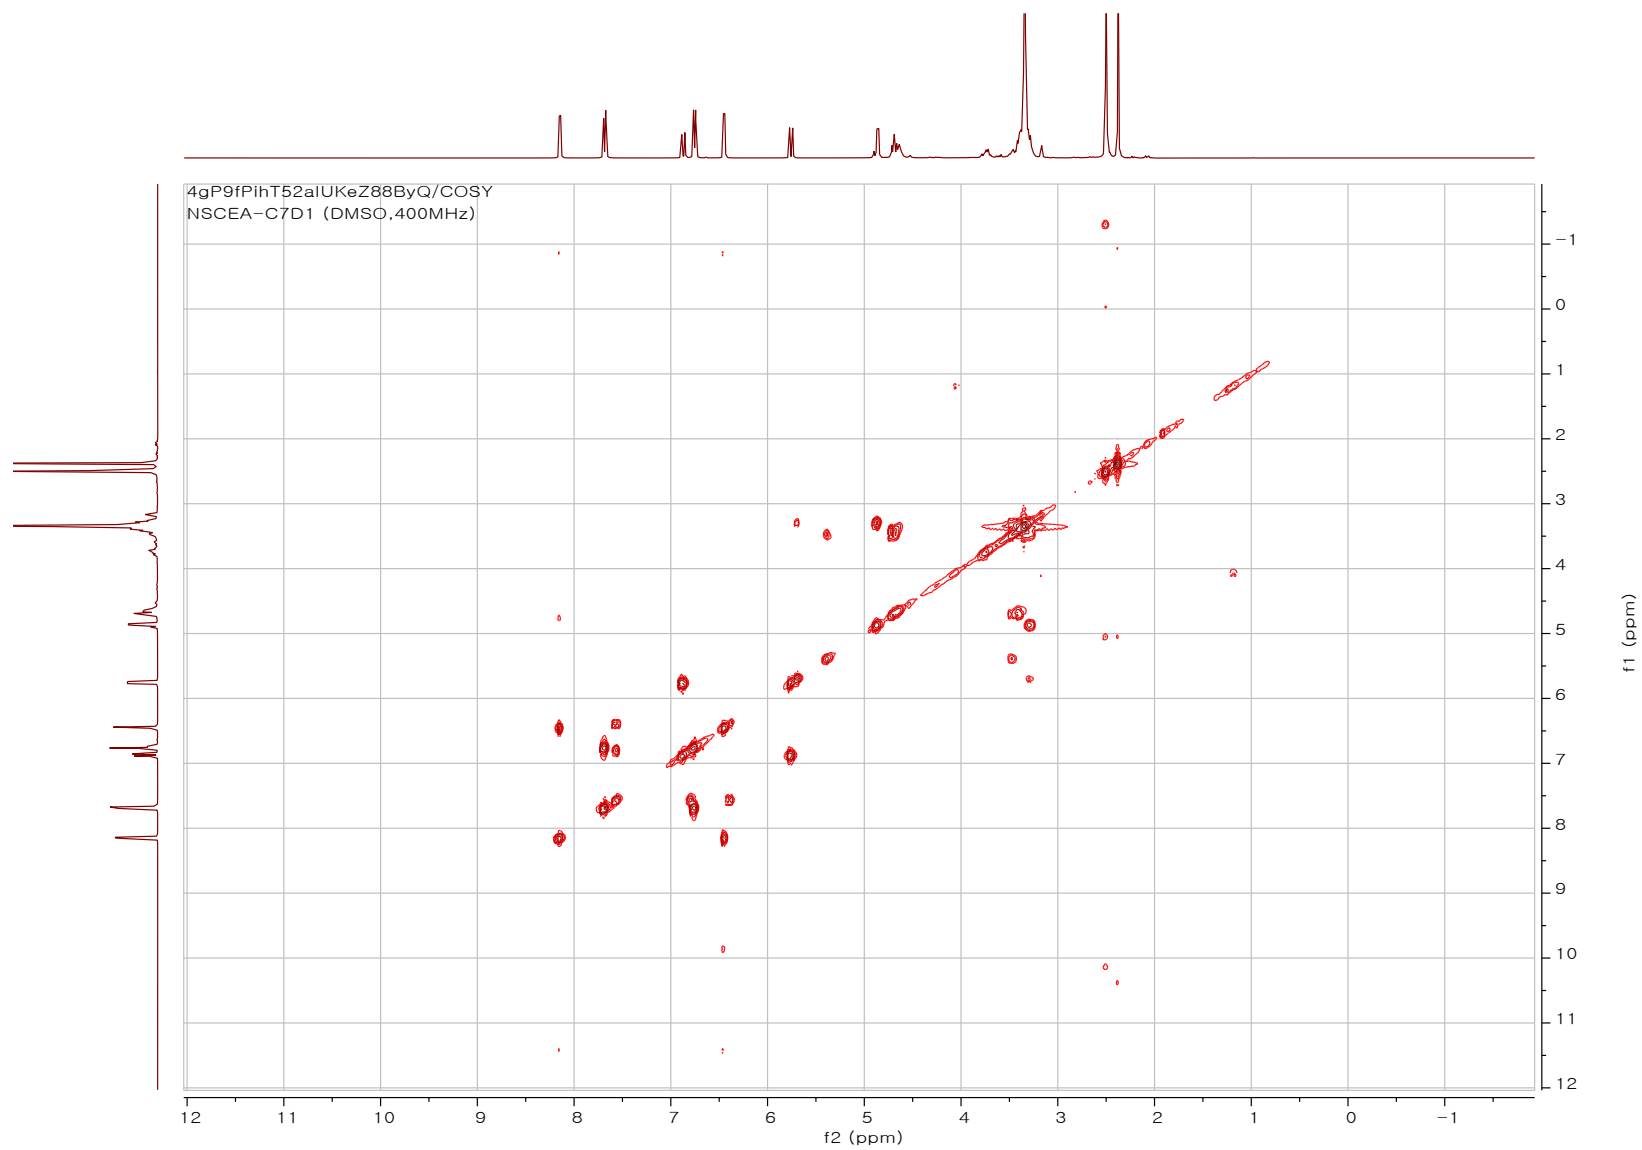

S4. The  $^1\text{H}$ - $^1\text{H}$  NOESY spectrum of compound 3

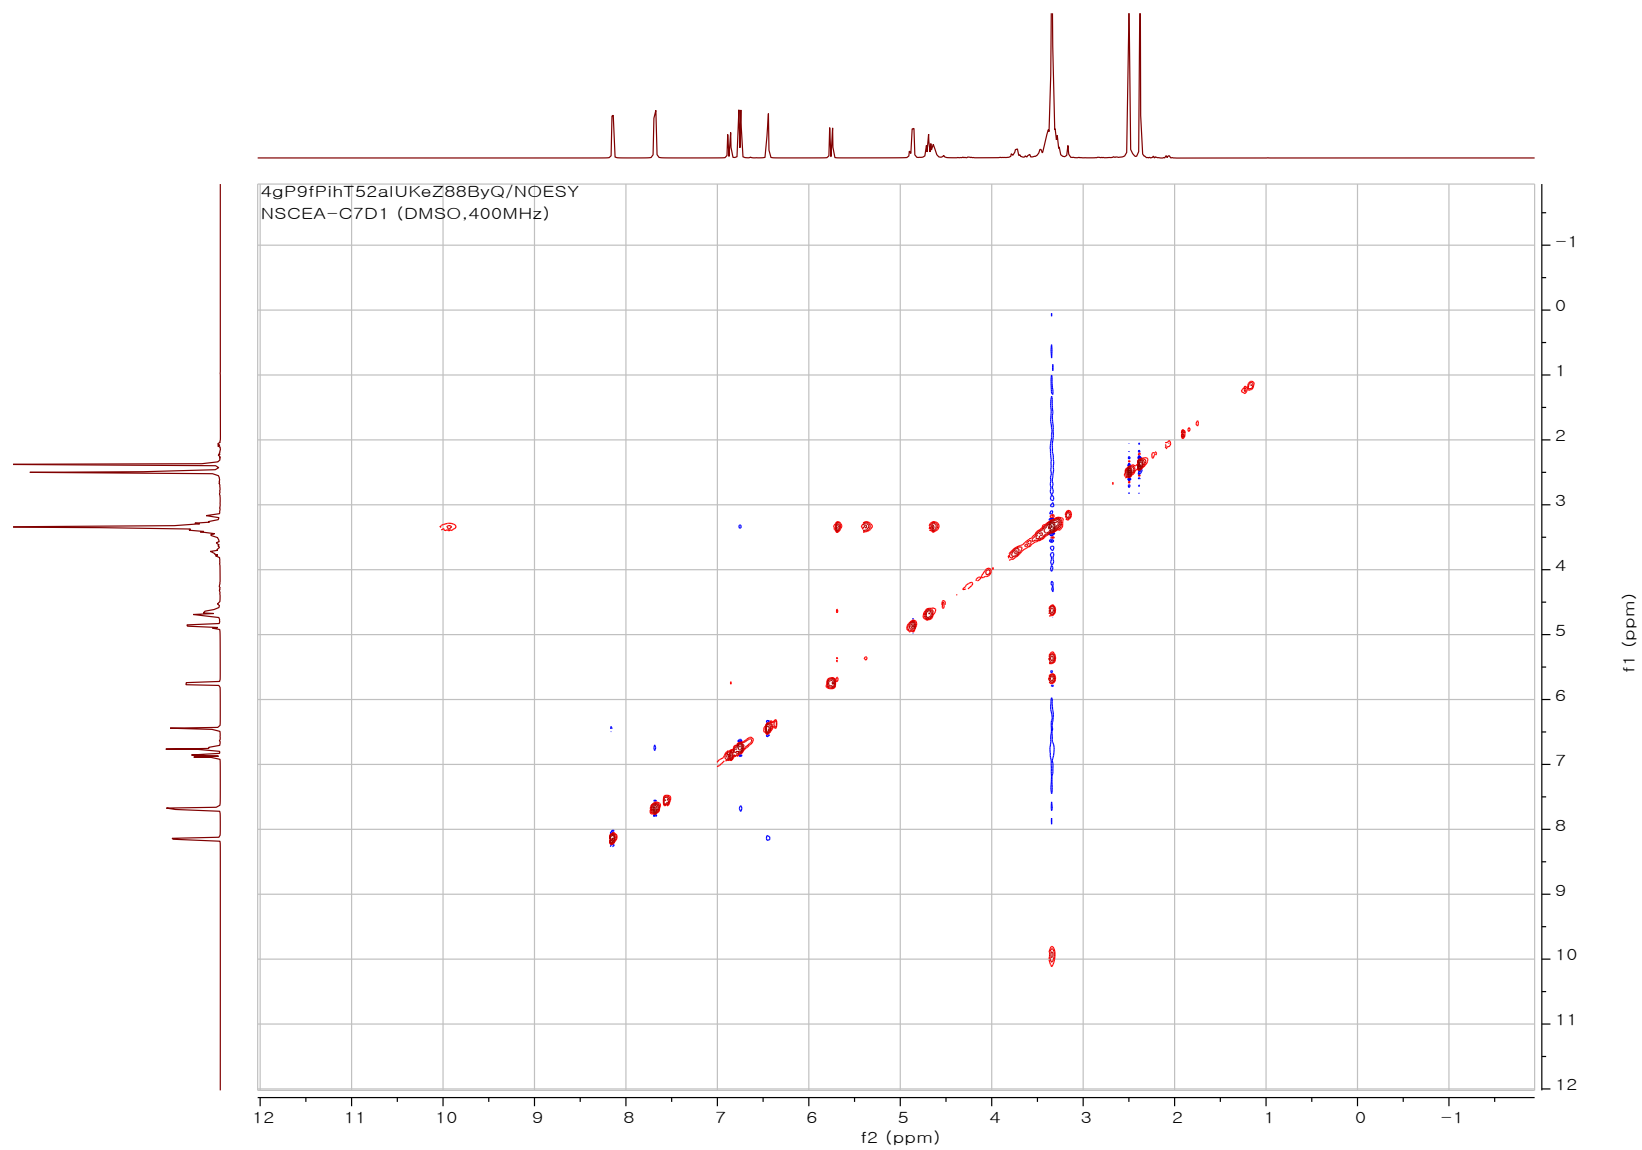

S5. The HMQC spectrum of compound 3

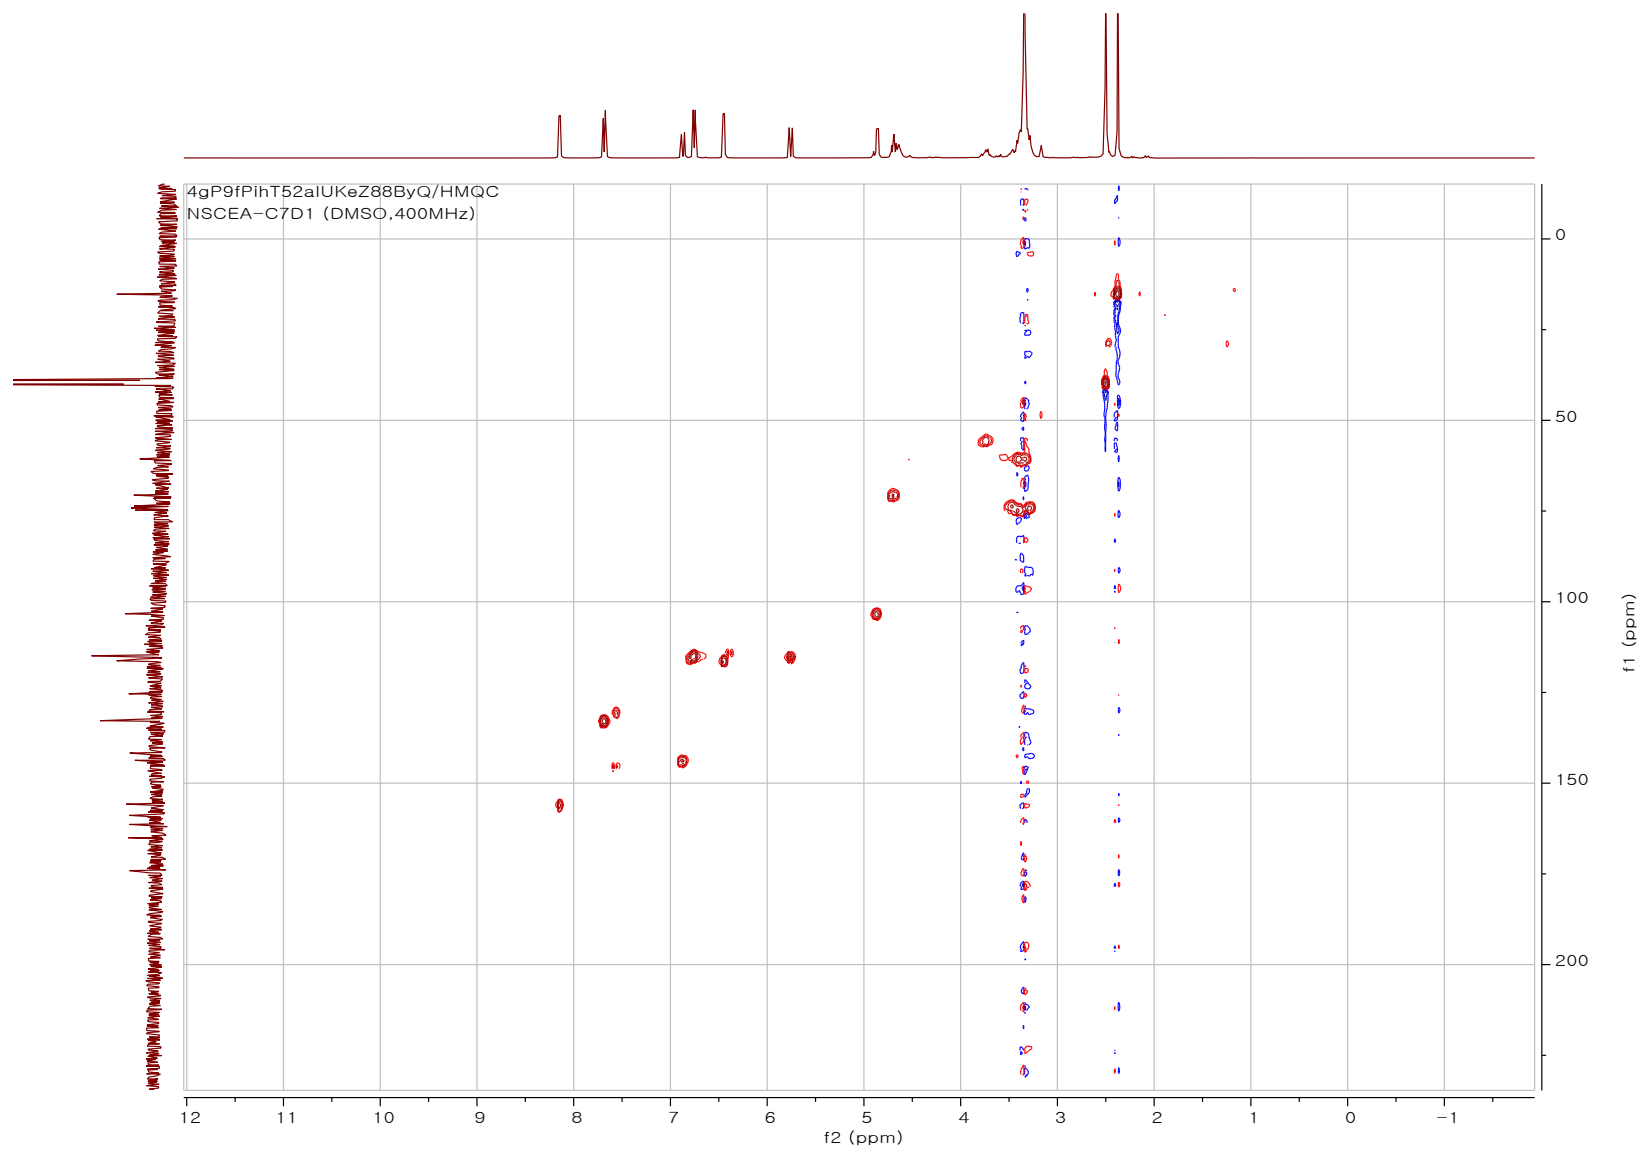

S6. The HMBC spectrum of compound 3

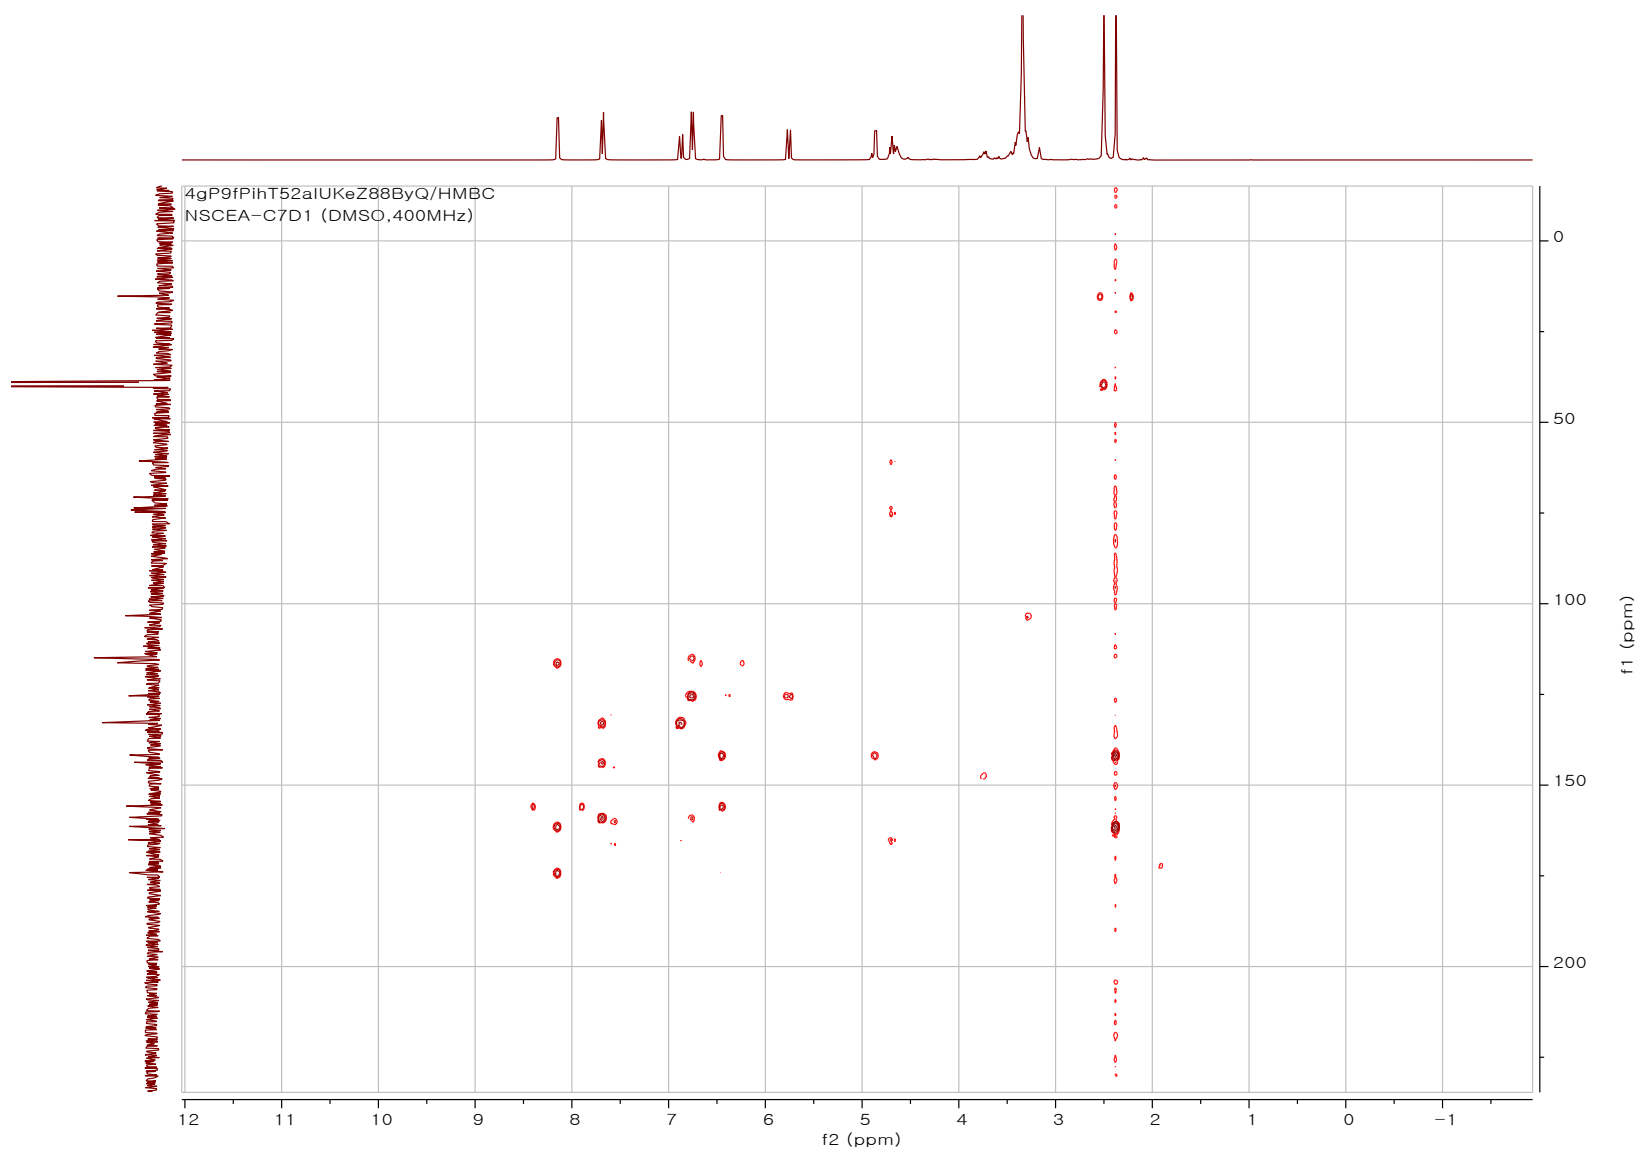

Supplement: c8ra09743g1.pdf [file c8ra09743g1.pdf]
